# Supplementary material for: How distinct are sleep sites from active sites across habitat types in lizards?
Source: Research Square preprint supplement (doi:10.21203/rs.3.rs-7860806/v1), 2025-11-03
Supplement: Supplementary file 2 [file c8cc203b1d8409f98abf8bbc.docx]

**How distinct are sleep sites from active sites across habitat types in lizards?**

Nitya Prakash Mohanty1,2,*, Anbazhagan Abinesh1, Saumitra Dhere1, Maria Thaker1

1Centre for Ecological Sciences, Indian Institute of Science, Bengaluru, India

2Département Adaptations du Vivant, UMR 7179, Mécanismes adaptatifs et Évolution (MECADEV) CNRS/Muséum national d'Histoire naturelle, Paris, France

*Corresponding author e-mail id: [nitya.mohanty@gmail.com](mailto:nitya.mohanty@gmail.com)

**Tables**

**Table 1** Measures of the relationship between active and sleep phase on parameter spaces constructed from principal component analyses in Agamid lizards. Areas of multivariate normal ellipses (at 95% confidence interval) for each phase are unitless; values in parentheses represent percentages of total area of parameter space. Results of PERMANOVA tests on observations along principal components 1 and 2, with the associated model R2 values in parentheses. ‘Variance’ indicates results of Multivariate homogeneity of groups dispersions tests. Dashes denote no tests or calculations performed due to lack of variability in data. Statistically significant tests (α = 0.05) in bold

| **Habitat** | **Species** | **Active**  **area** | **Sleep**  **area** | **Total**  **area** | **Active unique** | **Sleep unique** | **Overlap** | **PERMANOVA**  ***p-value*** | **Variance**  ***p-value*** |
| --- | --- | --- | --- | --- | --- | --- | --- | --- | --- |
| *Arboreal* | *Salea anamallayana* | 26.72 | 27.84 | 31.51 | 3.68  (11.67%) | 4.79  (15.21%) | 23.04  (73.12%) | 0.344  (0.02) | 0.831 |
| *Salea horsfieldii* | 36.78 | 9.84 | 38.49 | 28.64  (74.42%) | 1.70  (4.42%) | 8.14  (21.16%) | **0.035**  (0.04) | 0.596 |
| *Semi-arboreal* | *Calotes versicolor* | 42.29 | 16.49 | 42.29 | 25.81  (61.02%) | 0  (0%) | 16.49  (38.98%) | 0.150  (0.03) | 0.064 |
| *Monilesaurus rouxii* | 13.51 | 7.95 | 19.39 | 11.44  (59.00%) | 5.88  (30.35%) | 2.07  (10.65%) | **0.001**  (0.56) | 0.555 |
| *Rupicolous* | *Psammophilus dorsalis* | 7.73 | 9.04 | 10.75 | 1.70  (15.86%) | 3.02  (28.12%) | 6.02  (56.00%) | **0.046**  (0.09) | 0.201 |
| *Ground-dwelling* | *Sarada superba* | - | - | - | - | - | - | 0.11  (0.05) | 0.073 |
| *Sitana visiri* | - | - | - | - | - | - | **0.001**  (0.31) | **0.002** |
| *Sitana marudhamneydal* | - | - | - | - | - | - | **-** | - |

**Table 2** Ordinary Least Square regressions on perch characteristics of Agamid lizards in relation to diel phase (reference: active phase). Models for perch height and distance to trunk include trunk girth as covariate for arboreal and semi-arboreal species, where *β* is partial coefficient for diel phase. Mean values are based on observed data (in mm). Model for *Sitana marudhamneydhal* is not reported as observations did not show any variation. *Homogeneity of variance assumption violated according to Levene’s test of model residuals

| **Characteristics** | **Habitat** | **Species** | **Mean Active**  **(SE)** | **Mean Sleep**  **(SE)** | ***β*** | ***SE*** | ***df*** | ***p-value*** | ***R2*** |
| --- | --- | --- | --- | --- | --- | --- | --- | --- | --- |
| *Perch height* | Arboreal | *Salea anamallayana* | 1060 (104.93) | 1360 (118.44) | 0.12 | 0.06 | 47 | **0.04** | 0.06 |
|  | *Salea horsfieldii* | 1169.62 (99.49) | 1095.47 (71.45) | -0.04 | 0.06 | 66 | 0.57 | 0 |
|  | Semi-arboreal | *Calotes versicolor** | 924.51 (133.49) | 987.96 (97.69) | 0.18 | 0.10 | 49 | 0.085 | 0.08 |
|  | *Monilesaurus rouxii** | 984.09 (98.87) | 1699.81 (86.07) | 0.20 | 0.07 | 45 | **0.004** | 0.39 |
|  | Rupicolous | *Psammophilus dorsalis* | 816.56 (138.03) | 1279.14 (160.69) | 0.34 | 0.19 | 35 | 0.825 | 0.06 |
|  | Ground | *Sarada superba* | 29.96 (12.18) | 0 | -0.51 | 0.27 | 37 | 0.072 | 0.06 |
|  | *Sitana visiri** | 128.5 (31.12) | 0 | -0.96 | 0.23 | 62 | **<0.001** | 0.21 |
|  |  | *Sitana marudhamneydhal* | - | - | - | - | - | - | - |
|  |  |  |  |  |  |  |  |  |  |
| *Trunk girth* | Arboreal | *S*. *anamallayana* | 47.58 (4.81) | 42.53 (3.35) | -0.05 | 0.04 | 48 | 0.249 | 0.01 |
|  | *S*. *horsfieldii* | 64.74 (12.97) | 34.45 (2.59) | -0.20 | 0.06 | 67 | **<0.001** | 0.15 |
|  | Semi-arboreal | *C*. *versicolor* | 512.14 (74.99) | 323.04 (49.4) | -0.20 | 0.09 | 50 | **0.035** | 0.07 |
|  | *M*. *rouxii* | 1055.95 (180.36) | 148.03 (38.74) | -0.90 | 0.12 | 46 | **<0.001** | 0.54 |
|  |  |  |  |  |  |  |  |  |  |
| *Distance to trunk* | Arboreal | *S*. *anamallayana* | 308  (48.76) | 343.80 (66.63) | -0.10 | 0.22 | 47 | 0.65 | 0.03 |
|  | *S*. *horsfieldii** | 286.40 (51.99) | 290.23 (55.36) | -0.44 | 0.28 | 66 | 0.115 | 0.03 |
|  | Semi-arboreal | *C*. *versicolor* | 624.96 (137.63) | 502.6 (96.79) | 0.11 | 0.25 | 49 | 0.664 | 0 |
|  | *M*. *rouxii* | 30.90 (21.35) | 1117.57 (149.92) | 2.49 | 0.31 | 44 | **<0.001** | 0.70 |

**Table 3.** Chi-square test of proportions for change between diel phases in substrate type, perch type, and perch angle of Agamid lizards. Statistically significant tests (α = 0.05) in bold. Dashes indicate no tests performed due to no variation in observed data.

| **Habitat** | **Species** | ***Substrate type*** | | | ***Perch type*** | | | ***Perch angle*** | | |
| --- | --- | --- | --- | --- | --- | --- | --- | --- | --- | --- |
|  |  | *χ2* | *df* | *p-value* | *χ2* | *df* | *p-value* | *χ2* | *df* | *p-value* |
| Arboreal | *S*. *anamallayana* | **-** | **-** | **-** | 14.02 | 2 | **0.001** | 1.92 | 2 | 0.38 |
| *S*. *horsfieldii* | **-** | **-** | **-** | 4.16 | 3 | 0.244 | 5.42 | 2 | 0.06 |
| Semi-arboreal | *C*. *versicolor* | 6.71 | 2 | **0.035** | 9.82 | 3 | **0.02** | 1.53 | 2 | 0.46 |
| *M*. *rouxii* | 15.38 | 1 | **<0.001** | 36.8 | 2 | **<0.001** | 33.7 | 2 | **<0.001** |
| Rupicolous | *P*. *dorsalis* | 2.08 | 2 | 0.354 | 2.08 | 2 | 0.354 | 0.86 | 1 | 0.351 |
| Ground | *S*. *marudhamneydhal* | **-** | **-** | **-** | 2.54 | 1 | 0.111 | - | - | - |
| *S*. *superba* | 0.94 | 1 | 0.333 | 9.56 | 5 | 0.089 | - | - | - |
| *S*. *visiri* | 56.67 | 2 | **<0.001** | 38.70 | 2 | **<0.001** | 14.39 | 2 | **<0.001** |
